# Supplementary material for: Impact of Exercise on Vascular Function in Middle-Aged and Older Adults: A Scoping Review
Source: MDPI journal article supplement (doi:10.3390/sports10120208), 2022-12-14
Supplement: s1 [file s1]

**Table S2.** Population characteristics

| <i>Author, year (Reference)</i> | <i>Sex</i> | <i>Number of participants</i> | <i>Mean age</i> | <i>Mean body weight (kg)</i> | <i>BMI (kg/m<sup>2</sup>)</i> | <i>Nutritional status *</i> | <i>Medicine intake</i> | <i>Health status</i>                                                |
|---------------------------------|------------|-------------------------------|-----------------|------------------------------|-------------------------------|-----------------------------|------------------------|---------------------------------------------------------------------|
| <i>Afousi, 2018 (45)</i>        | Mixed      | 18                            | 54.78 ± 6.19    | 85.38 ± 11.23                | 29.38 ± 0.93                  | Pre-obesity                 | Yes                    | Type 2 diabetes                                                     |
|                                 |            | 17                            | 53.12 ± 4.84    | 82.64 ± 11.18                | 29.18 ± 0.88                  |                             |                        |                                                                     |
| <i>Akazawa, 2012 (26)</i>       | Female     | 11                            | 59 ± 5          | 54 ± 2                       | 22.7 ± 1.0                    | Normal weight               | NR                     | Healthy individuals                                                 |
| <i>Alkatib, 2014 (42)</i>       | Female     | 8                             | 55.2 ± 3.6      | 69.1 ± 15.1                  | NR                            | NR                          | NR                     | Healthy individuals                                                 |
| <i>Benda, 2015 (27)</i>         | Mixed      | 10                            | 63 ± 8          | 87.6 ± 23.6                  | 28.1 ± 7.5                    | Pre-obesity                 | Yes                    | Heart failure                                                       |
|                                 | Male       | 10                            | 64 ± 8          | 89.7 ± 11.9                  | 28.9 ± 4.7                    |                             |                        |                                                                     |
| <i>Boonpin, 2017 (53)</i>       | Female     | 20                            | 55.35 ± 2.84    | 59.11 ± 8.9                  | 25.22 ± 3.06                  | Pre-obesity                 | Yes                    | Hypertension and/or diabetes                                        |
| <i>Borges, 2021 (64)</i>        | Mixed      | 10                            | 57 ± 10.1       | NR                           | 23.5 ± 4                      | Normal weight               | Yes                    | Chagas heart disease                                                |
| <i>Bouaziz, 2019 (75)</i>       | Mixed      | 30                            | 72.9 ± 2.5      | 77.4 ± 15.4                  | 28.7 ± 5.6                    | Pre-obesity                 | Yes                    | Type 2 diabetes, hypertension, dyslipidaemia, osteoporosis, obesity |
| <i>Chacaroun, 2020 (83)</i>     | Mixed      | 12                            | 52 ± 12         | NR                           | 31.2 ± 2.4                    | Obesity class 1             | Yes                    | Obesity                                                             |
|                                 |            | 11                            | 56 ± 11         | NR                           | 31.8 ± 3.2                    |                             |                        |                                                                     |
| <i>Chasland, 2021 (84)</i>      | Male       | 21                            | 59.7 ± 5.1      | 101.4 (94.7–108)             | 33.7 (31.7–35.5)              | Obesity class 1             | Yes                    | Healthy individuals                                                 |
|                                 |            | 20                            | 59 ± 4.4        | 109.2 (102.4–116.1)          | 34.4 (32.4–36.4)              |                             |                        |                                                                     |
| <i>Conraads, 2015 (85)</i>      | Mixed      | 100                           | 57 ± 8.8        | 84.7 ± 14.4                  | 28.0 ± 4.4                    | Pre-obesity                 | Yes                    | Coronary artery disease                                             |
|                                 |            | 100                           | 59.9 ± 9.2      | 85.0 ± 13.7                  | 28.5 ± 4.3                    |                             |                        |                                                                     |
| <i>Cornelissen, 2014 (34)</i>   | Female     | 146                           | 61.8 ± 0.73     | 80.4 ± 1.05                  | 27.4 ± 0.34                   | Pre-obesity                 | Yes                    | Coronary artery disease                                             |
| <i>Dall, 2015</i>               | Mixed      | 9                             |                 | 79.0 ± 14.3                  | 26.7 ± 4                      | Pre-obesity                 | Yes                    | Heart transplant                                                    |

|                                      |        |     |              |              |              |                 |     |                                          |
|--------------------------------------|--------|-----|--------------|--------------|--------------|-----------------|-----|------------------------------------------|
| (87)                                 |        | 8   | 51.9 ± 33-70 | 78.1 ± 13.3  | 22.94 ± 4    | Normal weight   |     |                                          |
| <i>da Silva, 2012</i><br>(86)        | Mixed  | 10  | 50.7 ± 9.2   | NR           | 29 ± 6       | Pre-obesity     | Yes | Type 2 diabetes, metabolic syndrome      |
|                                      |        | 10  | 52.2 ± 7.5   | NR           | 26 ± 3       |                 |     |                                          |
| <i>Eigendorf, 2019</i><br>(43)       | Female | 146 | 53 ± 4.9     | 72.1 ± 13.7  | 25.6 ± 4.4   | Pre-obesity     | NR  | Hypertension, depression, hypothyroidism |
| <i>Eleutério-Silva, 2013</i><br>(35) | Female | 11  | 46.68 ± 3.43 | 83.18 ± 26   | 34.93 ± 7.54 | Obesity class 1 | Yes | Metabolic syndrome                       |
| <i>Gainey, 2016</i><br>(82)          | Mixed  | 11  | 63 ± 2       | 61.1 ± 3.4   | 26.6 ± 1.4   | Pre-obesity     | Yes | Type 2 diabetes                          |
|                                      |        | 12  | 58 ± 2       | 65.8 ± 2.7   | 27.01 ± 1.4  |                 |     |                                          |
| <i>Gelinas, 2017</i><br>(30)         | Mixed  | 24  | 69 ± 7       | NR           | 27.8 ± 2.8   | Pre-obesity     | yes | Chronic obstructive pulmonary disease    |
| <i>Gholami, 2020</i><br>(46)         | Mixed  | 16  | 53.4 ± 9.1   | NR           | 28.2 ± 2.5   | Pre-obesity     | Yes | Type 2 diabetes, peripheral neuropathy   |
| <i>Gibbs, 2012</i><br>(47)           | Mixed  | 3   | 58.5 ± 5     | NR           | 32.3         | Obesity class 1 | Yes | Type 2 diabetes                          |
| <i>Gliemann, 2020</i><br>(48)        | Female | 10  | 62.3 ± 6.5   | 74.7 ± 14.2  | NR           | NR              | No  | Healthy individuals                      |
| <i>Grafe, 2018</i><br>(36)           | Mixed  | 15  | 66.1 ± 5.1   | 87.3 ± 12.8  | 27.7 ± 3.8   | Pre-obesity     | Yes | Coronary artery disease                  |
| <i>Green, 2014</i><br>(37)           | Mixed  | 45  | 41 ± 17      | 94.7 ± 22.3  | 28.6 ± 6.3   | Pre-obesity     | Yes | NR                                       |
|                                      |        | 45  | 42 ± 15      | 86.0 ± 19.1  | 28.1 ± 5.3   |                 |     |                                          |
|                                      |        | 47  | 42 ± 14      | 84.9 ± 14.4  | 28.0 ± 3.8   |                 |     |                                          |
|                                      |        | 45  | 45 ± 15      | 80.6 ± 12.7  | 27.0 ± 3.9   |                 |     |                                          |
| <i>Greenwood, 2015</i><br>(50)       | Mixed  | 13  | 53.9 ± 10.7  | 76.3 ± 15.6  | 26.6 ± 4.7   | Pre-obesity     | Yes | Renal transplant                         |
|                                      |        | 13  | 54.6 ± 10.6  | 79.4 ± 13.8  | 28.2 ± 3.6   |                 |     |                                          |
| <i>Greenwood, 2015</i><br>(49)       | Mixed  | 16  | 53.8 ± 13.5  | 76.5 ± 15.2  | 27.4 ± 3.52  | Pre-obesity     | Yes | Chronic kidney disease                   |
| <i>Gunnarsson, 2020</i><br>(51)      | Female | 8   | 63.9 ± 5.1   | 65.8 ± 7.0   | 25.1 ± 2.9   | Pre-obesity     | Yes | Hypertension                             |
|                                      |        | 9   | 63.3 ± 6.9   | 81.1 ± 16.8  | 28.7 ± 6.2   |                 |     |                                          |
| <i>Haynes, 2021</i><br>(52)          | Mixed  | 17  | 61.9 ± 5.4   | 72.8 ± 11.5  | NR           | NR              | NR  | Healthy individuals                      |
|                                      |        | 18  | 62.2 ± 7.4   | 77.6 ± 21.1  |              |                 |     |                                          |
| <i>Headley, 2014</i>                 | Mixed  | 25  | 58 ± 8       | 101.7 ± 24.9 | 34.9 ± 8.0   | Obesity class 1 | Yes | Chronic kidney disease                   |

|                                 |        |    |              |              |            |                 |     |                                        |
|---------------------------------|--------|----|--------------|--------------|------------|-----------------|-----|----------------------------------------|
| (54)                            |        |    |              |              |            |                 |     |                                        |
| <i>Hellsten, 2012</i><br>(38)   | Mixed  | 11 | 46 ± 1       | 76.7 ± 2.8   | NR         | NR              | Yes | Hypertension                           |
|                                 |        | 10 | 47 ± 1       | 80.6 ± 7.7   |            |                 |     |                                        |
| <i>Hildreth, 2018</i><br>(55)   | Male   | 19 | 66 ± 5       | 91.3 ± 13.0  | 28.9 ± 3.4 | Pre-obesity     | Yes | Hypertension, dyslipidemia             |
| <i>Hotta, 2019</i><br>(56)      | Mixed  | 15 | 71 ± 2       | 92 ± 9.5     | 33 ± 3.3   | Obesity class 1 | Yes | Peripheral artery disease              |
| <i>Jaime, 2019</i><br>(57)      | Female | 12 | 64 ± 1       | 60.3 ± 2.3   | 24 ± 0.6   | Normal weight   | NR  | Healthy individuals                    |
| <i>Kato, 2017</i><br>(58)       | Mixed  | 25 | 70 ± 11      | NR           | 22.5 ± 3.3 | Normal weight   | Yes | Chronic heart failure                  |
| <i>Keech, 2020</i><br>(59)      | Mixed  | 29 | 54 ± 7       | 85 ± 23      | 27.7 ± 7   | Pre-obesity     | Yes | Coronary artery disease                |
| <i>Kim, 2019</i><br>(39)        | Mixed  | 10 | 69.33 ± 2.54 | 62.13 ± 4.29 | NR         | NR              | Yes | Chronic diseases or metabolic syndrome |
| <i>Kirkman, 2019</i><br>(60)    | Mixed  | 16 | 55 ± 13      | NR           | 30 ± 2     | Pre-obesity     | Yes | Chronic kidney disease                 |
| <i>Klonizakis, 2014</i><br>(61) | Mixed  | 7  | 64 ± 4       | 63 ± 13.5    | NR         | NR              | Yes | NR                                     |
|                                 |        | 11 | 64 ± 7       | 62.3 ± 6     |            |                 |     |                                        |
| <i>Koshiha, 2019</i><br>(40)    | Female | 20 | 60.1 ± 1.6   | 56.8 ± 1.9   | 23.4 ± 0.6 | Normal weight   | NR  | NR                                     |
| <i>Kujawski, 2018</i><br>(62)   | Mixed  | 27 | 64 ± NR      | NR           | 26.7 ± 4   | Pre-obesity     | NR  | Healthy individuals                    |
|                                 |        | 28 | 66 ± NR      |              | 22.94 ± 4  | Normal weight   |     |                                        |
| <i>Lee, 2019</i><br>(63)        | Female | 15 | 49.1 ± 7.9   | 80.9 ± 17.7  | 33.1 ± 7.6 | Obesity class 1 | Yes | Breast cancer                          |
| <i>Lekavich, 2021</i><br>(65)   | Mixed  | 11 | 53.1 ± 6.4   | 90.5 ± 10.4  | 31.7 ± 3.4 | Obesity class 1 | NR  | Obesity, dyslipidemia                  |
|                                 |        | 10 | 47 ± 12.3    | 86.5 ± 12.7  | 29.3 ± 2.3 | Pre-obesity     | NR  |                                        |
| <i>Luk, 2011</i><br>(66)        | Mixed  | 32 | 67.7 ± 9     | NR           | 24.7 ± 2.4 | Normal weight   | Yes | Healthy individuals                    |
| <i>Magalhães, 2019</i><br>(67)  | Mixed  | 13 | 58.9 ± 7.5   | 84.2 ± 19.2  | 30.2 ± 5.9 | Obesity class 1 | Yes | Type 2 diabetes                        |
|                                 |        | 16 | 60.4 ± 6.8   | 82.0 ± 13.8  | 31.0 ± 5.5 |                 |     |                                        |
| <i>Munch, 2018</i><br>(41)      | Mixed  | 6  | 66 ± 2       | 77 ± 5       | 25 ± 2     | Normal weight   | No  | Heart failure                          |

|                                |        |    |            |             |            |                 |     |                                         |
|--------------------------------|--------|----|------------|-------------|------------|-----------------|-----|-----------------------------------------|
|                                |        | 8  | 58 ± 4     | 89 ± 6      | 29.2 ± 2   | Pre-obesity     | Yes |                                         |
|                                |        | 16 | 60.4 ± 6.8 | 82.0 ± 13.8 | 31.0 ± 5.5 | Obesity class 1 | Yes |                                         |
| <i>Munch, 2018</i><br>(68)     | Mixed  | 14 | 63 ± 3     | 87 ± 3      | 28 ± 1     | Pre-obesity     | Yes | Heart failure                           |
|                                |        | 12 | 59 ± 3     | 89 ± 5      | 29 ± 1     |                 |     |                                         |
| <i>Nishiwaki, 2015</i><br>(28) | Male   | 8  | 45 ± 4     | 69.9 ± 2.2  | 23.6 ± 0.9 | Normal weight   | NR  | Healthy individuals                     |
| <i>Novaković, 2019</i><br>(69) | Mixed  | 10 | 65.1 ± 7.6 | NR          | 30.4 ± 6.2 | Obesity class 1 | Yes | Peripheral artery disease               |
|                                |        | 11 | 65.6 ± 11  | NR          | 27.3 ± 3.3 | Pre-obesity     |     |                                         |
| <i>Nualnim, 2012</i><br>(70)   | Mixed  | 24 | 58 ± 2     | 81 ± 3      | 29 ± 1     | Pre-obesity     | No  | Healthy individuals                     |
| <i>Nyberg, 2016</i><br>(29)    | Female | 20 | 50 ± 0     | 69.2 ± 1.4  | 24.4 ± 0.5 | Normal weight   | NR  | Healthy individuals                     |
|                                |        | 16 | 54 ± 1     | 64.4 ± 1.8  | 23.1 ± 0.5 |                 |     |                                         |
| <i>O'Brien, 2020</i><br>(71)   | Mixed  | 12 | 68 ± 5     | NR          | 25.9 ± 3.1 | Pre-obesity     | Yes | Hypertension, asthmatic, hypothyroidism |
|                                |        | 12 | 68 ± 6     | NR          | 25.2 ± 3.6 |                 |     |                                         |
|                                |        | 14 | 66 ± 7     | NR          | 27.2 ± 5.1 |                 |     |                                         |
| <i>Park SY, 2020</i><br>(72)   | Mixed  | 28 | 60 ± 9     | 55 ± 7.4    | 22.8 ± 2.8 | Normal weight   | Yes | NR                                      |
|                                |        | 25 | 60 ± 10    | 56.5 ± 5.7  | 22.5 ± 2.4 |                 |     |                                         |
| <i>Park S-Y, 2019</i><br>(73)  | Mixed  | 42 | 70 ± 10    | 54.1 ± 7.1  | 20.4 ± 2.1 | Normal weight   | Yes | Peripheral artery disease               |
| <i>Park W, 2020</i><br>(74)    | Male   | 10 | 69.1 ± 0.9 | 70.7 ± 3.8  | 26.2 ± 0.5 | Pre-obesity     | Yes | Peripheral artery disease               |
| <i>Pierce, 2011</i><br>(30)    | Mixed  | 26 | 63 ± 1     | 73.5 ± 2.9  | 25.3 ± 0.7 | Pre-obesity     | Yes | Healthy individuals                     |
| <i>Pierce, 2016</i><br>(31)    | Mixed  | 14 | 63 ± 1     | 71 ± 2.6    | 23.5 ± 0.6 | Normal weight   | Yes | NR                                      |
| <i>Schmidt, 2014</i><br>(76)   | Male   | 9  | 68 ± 4     | 77.7 ± 9.4  | 26.1 ± 3.9 | Pre-obesity     | NR  | Healthy individuals                     |
|                                |        | 9  | 69.1 ± 3.1 | 85.8 ± 12   | 27.4 ± 2.8 |                 |     |                                         |
| <i>Schreuder, 2014</i><br>(77) | Mixed  | 10 | 57 ± 6     | 106 ± 18    | 30.9 ± 4.1 | Obesity class 1 | Yes | Type 2 diabetes                         |
|                                |        | 9  | 52 ± 8     | 115 ± 23    | 36.0 ± 6.5 | Obesity class 2 |     |                                         |
| <i>Shinno, 2017</i><br>(78)    | Female | 11 | 47.9 ± 2.2 | 54 ± 11.6   | NR         | NR              | No  | Healthy individuals                     |
|                                |        | 11 | 46.9 ± 3.2 | 53.6 ± 8.6  |            |                 |     |                                         |
| <i>Tanahashi, 2017</i><br>(32) | Mixed  | 26 | 61 ± 7     | 58.7±7.3    | 23.1±2.4   | Normal weight   | NR  | Healthy individuals                     |

|                                 |        |    |            |             |             |                 |     |                      |
|---------------------------------|--------|----|------------|-------------|-------------|-----------------|-----|----------------------|
| <i>van Zanten, 2019</i><br>(33) | Mixed  | 50 | 50 ± 10    | NR          | 28.8 ± 1.77 | Pre-obesity     | Yes | Rheumatoid arthritis |
| <i>Vinet, 2018</i><br>(79)      | Mixed  | 17 | 58.2 ± 3.8 | 92 ± 13.6   | 32.8 ± 0.7  | Obesity class 1 | Yes | Metabolic syndrome   |
|                                 |        | 21 | 67.7 ± 4.2 | 85.2 ± 13.1 | 32.3 ± 13.1 |                 |     |                      |
|                                 |        | 24 | 59.2 ± 5.1 | 89.4 ± 12   | 33.7 ± 3.6  |                 |     |                      |
| <i>Williams, 2013</i><br>(80)   | Mixed  | 25 | 66.9 ± 4.3 | 78.5 ± 15.6 | 28.1 ± 4.4  | Pre-obesity     | Yes | Healthy individuals  |
|                                 |        | 24 | 66.4 ± 4.3 | 78.2 ± 15.2 | 28.0 ± 4.9  |                 |     |                      |
| <i>Wong, 2014</i><br>(81)       | Female | 15 | 57 ± 1     | 87.6 ± 4.1  | 34.2 ± 1.2  | Obesity class 1 | NR  | Healthy individuals  |

\* Nutritional status classifications accordingly National Institute of Health (*NIH*) and the World Health Organization (*WHO*) for White, Hispanic, and Black individuals (1). Body mass index (*BMI*); Not reported (*NR*). 1. Weir CB, Jan A. BMI classification percentile and cut-off points. 2019;
