# Supplementary material for: Impact of Exercise on Vascular Function in Middle-Aged and Older Adults: A Scoping Review
Source: MDPI journal article supplement (doi:10.3390/sports10120208), 2022-12-14
Supplement: s1 [file s1]

**Table S1.** Exercise interventions characteristics

| <i>Author, year<br/>(Reference)</i> | <i>Study<br/>Design</i> | <i>Age<br/>group</i> | <i>Exercise<br/>Modalities</i> | <i>Intensity of<br/>Exercise</i> | <i>Intervention<br/>Duration<br/>(weeks)</i> | <i>Training<br/>Frequency<br/>(days/week)</i> | <i>Training<br/>Session<br/>Duration<br/>(min/session)</i> | <i>Effects of exercise on vascular function</i>                                                                                                                              |
|-------------------------------------|-------------------------|----------------------|--------------------------------|----------------------------------|----------------------------------------------|-----------------------------------------------|------------------------------------------------------------|------------------------------------------------------------------------------------------------------------------------------------------------------------------------------|
| <b>Type of exercise: Endurance</b>  |                         |                      |                                |                                  |                                              |                                               |                                                            |                                                                                                                                                                              |
| <i>Afousi, 2018<br/>(45)</i>        | RCT                     | Middle-age           | Walking / running              | High-intensity                   | 12                                           | 3                                             | 50 – 60                                                    | The exercise intervention increased brachial artery FMD ( $p = 0.01$ ) in type 2 diabetes patients. The improvements were more significant in high-intensity training group. |
| <i>Benda, 2015<br/>(27)</i>         | Non-RCT                 | Middle-age           | Cycling                        | High-intensity                   | 12                                           | 2                                             | 45 – 50                                                    | No effects on brachial and superficial femoral FMD.                                                                                                                          |
| <i>Conraads, 2015<br/>(85)</i>      | RCT                     | Middle-age           | Cycling                        | High-intensity                   | 12                                           | 3                                             | 30 – 60                                                    | Increase of FMD and improvement of resting diastolic BP after training, regardless of intervention, in patients with coronary artery disease.                                |
|                                     |                         |                      | Cycling                        | High-intensity                   |                                              |                                               | 60                                                         |                                                                                                                                                                              |
| <i>Dall, 2015<br/>(87)</i>          | RCT                     | Middle-age           | Cycling                        | High-intensity                   | 12                                           | 3                                             | 30                                                         | The exercise intervention had any effect on RHI or ALX. Loss of intervention impact 5 months after exercise cessation.                                                       |
| <i>da Silva, 2012<br/>(86)</i>      | RCT                     | Middle-age           | Walking / running              | High -intensity                  | 6                                            | 4                                             | 50                                                         | High-intensity training improved RH-induced dilation compared with low-intensity training ( $p < 0.05$ ) in patients with metabolic syndrome and type 2 diabetes.            |
| <i>Gliemann, 2020<br/>(48)</i>      | RCT                     | Middle-age           | Floorball                      | High-intensity                   | 10                                           | 2                                             | 40 – 60                                                    | HIIT increase vascular responsiveness to ACh ( $p < 0.05$ ). No effects were observed on mean BP, blood flow, and LVC.                                                       |
| <i>Gunnarsson, 2020<br/>(51)</i>    | RCT                     | Middle-age           | Floorball                      | High-intensity                   | 10                                           | 2                                             | 40 – 60                                                    | HIT improved the vasodilator response mediated by infusion of SNP ( $p < 0.05$ ) and ACh ( $p < 0.05$ ).                                                                     |
| <i>Hellsten, 2012<br/>(38)</i>      | Non-RCT                 | Middle-age           | Cycling                        | High-intensity                   | 8                                            | 3                                             | 60                                                         | No effects were observed on LVC with ACh infusion between the groups before or after training.                                                                               |

|                                  |         |                  |                                                                                  |                          |    |    |    |                                                                                                                                                     |
|----------------------------------|---------|------------------|----------------------------------------------------------------------------------|--------------------------|----|----|----|-----------------------------------------------------------------------------------------------------------------------------------------------------|
| <i>Keech, 2020</i><br>(59)       | RCT     | Middle-age       | Cycling                                                                          | High-intensity           | 6  | 2  | 15 | No effects were observed on fePWV and ALX.                                                                                                          |
| <i>Klonizakis, 2014</i><br>(61)  | RCT     | Middle-age       | Cycling                                                                          | High-intensity           | 2  | 3  | 40 | No effects were observed on GTN-mediated dilation, baFMD and RH.                                                                                    |
| <i>Lee, 2019</i><br>(63)         | RCT     | Middle-age       | Cycling                                                                          | High-intensity           | 8  | 3  | 40 | Increase of brachial artery FMD ( $p = 0.005$ ) after exercise intervention in breast cancer patients. No effect of exercise intervention on IMT.   |
| <i>Luk, 2011</i><br>(66)         | RCT     | Middle-age       | Treadmill, ergometer, rowing, steps, arm ergometer, dumbbell and weight training | High-intensity           | 8  | 3  | 60 | Increase of brachial artery FMD ( $p = 0.002$ ) after exercise intervention in patients with coronary artery disease. No effect of exercise on GTN. |
| <i>Munch, 2018</i><br>(41)       | Non-RCT | Middle-age/older | Cycling                                                                          | High-intensity           | 6  | 3  | 60 | Increase of ACh-induced vasodilation and in patients with heart failure ( $p < 0.05$ ).                                                             |
| <i>O'Brien, 2020</i><br>(71)     | RCT     | Older            | Cycling                                                                          | High-intensity           | 6  | 3  | 40 | HIIT increased baFMD (both $p < 0.001$ ), pop-FMD and L-FMC (both, $p < 0.045$ ). HIIT improved BA L-FMC ( $p < 0.001$ ).                           |
| <i>Vinet, 2018</i><br>(79)       | RCT     | Middle-age/older | NR                                                                               | High-intensity           | 24 | NR | NR | Improvement of large vessels vascular function (FMD) after exercise intervention in metabolic syndrome patients ( $p < 0.001$ ).                    |
| <i>Cornelissen, 2014</i><br>(34) | Non-RCT | Middle-age       | Cycling, running, arm ergometer, rowing and calisthenics                         | Moderated-high-intensity | 12 | 3  | 90 | Exercise intervention increased FMD ( $p < 0.0001$ ).<br>No effects were observed on RHI.                                                           |
| <i>Greenwood, 2015</i><br>(50)   | RCT     | Middle-age       | Treadmill + elliptical                                                           | Moderated-high-intensity | 12 | 3  | 47 | Endurance training improved PWV in kidney transplant recipients ( $p < 0.001$ ).                                                                    |
| <i>Haynes, 2021</i><br>(52)      | RCT     | Middle-age       | Land walking / jogging                                                           | Moderated-high-intensity | 24 | 3  | 60 | Increase of brachial artery FMD after land walking intervention only ( $p = 0.034$ ) in sedentary older adults. No effects on brachial              |
|                                  |         |                  | Water walking / jogging                                                          | Moderated-high-intensity |    |    |    |                                                                                                                                                     |

|                                |         |            |                                                |                          |    |   |         |                                                                                                                                                                                                                    |
|--------------------------------|---------|------------|------------------------------------------------|--------------------------|----|---|---------|--------------------------------------------------------------------------------------------------------------------------------------------------------------------------------------------------------------------|
|                                |         |            |                                                |                          |    |   |         | dilation induced by GTN, regardless of training intervention.                                                                                                                                                      |
| <i>Kirkman, 2019</i><br>(60)   | RCT     | Middle-age | Cycling, walking/jogging, or elliptical        | Moderated-high-intensity | 12 | 3 | 45      | No effects on ALX and carotid/femoral FMD after exercise intervention in non-dialysis chronic kidney disease patients. Exercise maintained conduit artery endothelial function (prevention of FMD and RH decline). |
| <i>Lekavich, 2021</i><br>(65)  | RCT     | Middle-age | Cycling, walking, stair climbing or elliptical | Moderated-high-intensity | 32 | 3 | 60      | Aerobic training had no effect on FMD.                                                                                                                                                                             |
| <i>Park SY, 2020</i><br>(72)   | RCT     | Middle-age | Land gait                                      | Moderated-high-intensity | 12 | 4 | 60      | Exercise intervention decreased leg and brachial-to-ankle arterial PWV in patients with peripheral artery disease ( $p < 0.5$ ). None effect on ABL.                                                               |
| <i>Schreuder, 2014</i><br>(77) | RCT     | Middle-age | Cycling                                        | Moderated-high-intensity | 8  | 3 | 45      | Exercise intervention improved baFMD/GTN (both $p < 0.05$ ). No effects were observed on baFMD, baGTN, and feFMD.                                                                                                  |
| <i>Afousi, 2018</i><br>(31)    | RCT     | Middle-age | Cycling                                        | Moderated-intensity      | 12 | 3 | 60      | Exercise interventions increased brachial artery FMD ( $p = 0.01$ ) in type 2 diabetes patients. However, improvements were more significant in high-intensity training group.                                     |
| <i>Benda, 2015</i><br>(27)     | Non-RCT | Middle-age | Cycling                                        | Moderated-intensity      | 12 | 2 | 30      | No effects on brachial and superficial femoral FMD.                                                                                                                                                                |
| <i>Chacaroun, 2020</i><br>(83) | RCT     | Middle-age | Cycling                                        | Moderated-intensity      | 8  | 3 | 20 – 60 | No effects were observed on RHI and PWV.                                                                                                                                                                           |
| <i>Dall, 2015</i><br>(87)      | RCT     | Middle-age | Cycling                                        | Moderated-intensity      | 12 | 3 | 45      | The exercise intervention had any effect on RHI or ALX. Loss of intervention impact 5 months after exercise cessation.                                                                                             |
| <i>Gainey, 2016</i><br>(82)    | RCT     | Middle-age | Treadmill                                      | Moderated-intensity      | 12 | 3 | 30      | Increase of FMD after exercise intervention in patients with type 2 diabetes ( $p < 0.05$ ). No effects on ABL.                                                                                                    |

|                                 |         |                  |                                                 |                     |    |       |         |                                                                                                                                                                                         |
|---------------------------------|---------|------------------|-------------------------------------------------|---------------------|----|-------|---------|-----------------------------------------------------------------------------------------------------------------------------------------------------------------------------------------|
| <i>Gelinas, 2017</i><br>(44)    | RCT     | Middle-age       | Upper and lower cycling ergometers              | Moderated-intensity | 8  | 3     | 35 – 45 | No effect on FMD after exercise training.                                                                                                                                               |
| <i>Gholami, 2020</i><br>(46)    | RCT     | Middle-age       | Cycling                                         | Moderated-intensity | 12 | 3     | 30 – 45 | Increase of FMD after exercise intervention in patients with type 2 diabetes and peripheral neuropathy ( $p = 0.0001$ ).                                                                |
| <i>Klonizakis, 2014</i><br>(45) | RCT     | Middle-age       | Cycling                                         | Moderated-intensity | 2  | 3     | 40      | No effects were observed on GTN-mediated dilation, baFMD and RH.                                                                                                                        |
| <i>Kujawski, 2018</i><br>(62)   | RCT     | Middle-age/older | Callisthenic                                    | Moderated-intensity | 12 | 2     | 50      | Callisthenic training improved aortic stiffness (PWV, $p < 0.05$ ) in healthy older adults.                                                                                             |
| <i>Munch, 2018</i><br>(68)      | RCT     | Middle-age/older | Cycling                                         | Moderated-intensity | 6  | 3     | 45      | No alterations in vascular function (FMD and leg blood flow during active leg movement) after training.                                                                                 |
| <i>O'Brien, 2020</i><br>(81)    | RCT     | Older            | Cycling                                         | Moderated-intensity | 6  | 3     | 34      | Moderate-intensity continuous training increased baFMD (both $p < 0.001$ ), pop- FMD and L-FMC (both, $p < 0.045$ ).                                                                    |
| <i>Pierce, 2016</i><br>(31)     | Non-RCT | Middle-age       | Walking                                         | Moderated-intensity | 8  | 6 – 7 | 45 – 50 | No effects were observed on aortic ALX and aortic PWV.                                                                                                                                  |
| <i>Pierce, 2011</i><br>(30)     | Non-RCT | Middle-age       | Walking                                         | Moderated-intensity | 8  | 6 – 7 | 40 – 50 | Exercise intervention increased baFMD ( $p < 0.001$ ) in middle-aged men but not in postmenopausal women.                                                                               |
| <i>Schmidt, 2014</i><br>(76)    | RCT     | Older            | Football                                        | Moderated-intensity | 48 | 2 – 3 | 60      | No effects of football and strength training on RHI and ALX.                                                                                                                            |
| <i>van Zanten, 2019</i><br>(33) | Non-RCT | Middle-age       | Treadmills, cycling, hand and rowing ergometers | Moderated-intensity | 12 | 3     | 60      | Improvement of vascular function (FMD, GTN and SNP) after exercise intervention ( $p < 0.05$ ).                                                                                         |
| <i>Akazawa, 2012</i><br>(26)    | Non-RCT | Middle-age       | Cycling + walking                               | Low-intensity       | 8  | 3     | 30 – 60 | Increase of brachial artery FMD after exercise training ( $p < 0.05$ ) in postmenopausal women.                                                                                         |
| <i>Alkatib, 2014</i><br>(42)    | RCT     | Middle-age       | Treadmill                                       | Low-intensity       | 8  | 2     | 40      | Improvement of cutaneous vascular conductance induced by SNP and ACh in the lower-limb and the upper-limb ( $p < 0.05$ ) after exercise intervention in sedentary postmenopausal women. |

|                                |         |            |                                              |                |         |       |         |                                                                                                                                                                                    |
|--------------------------------|---------|------------|----------------------------------------------|----------------|---------|-------|---------|------------------------------------------------------------------------------------------------------------------------------------------------------------------------------------|
| <i>Bouaziz, 2019</i><br>(75)   | RCT     | Middle-age | Cycling                                      | Low-intensity  | 9,5     | 2     | 30      | Improvement of brachial artery FMD after exercise intervention ( $p < 0.05$ ) in sedentary older adults. No effect of exercise training on carotid/radial and carotid/femoral FMD. |
| <i>da Silva, 2012</i><br>(86)  | RCT     | Middle-age | Walking / running                            | low -intensity | 6       | 4     | 50      | No effect on RH-induced dilation in patients with metabolic syndrome and type 2 diabetes.                                                                                          |
| <i>Headley, 2014</i><br>(54)   | RCT     | Middle-age | Cycling, walking/jogging, elliptical, rowing | Low-intensity  | 16      | 3     | 55      | No effects were observed on aPWV.                                                                                                                                                  |
| <i>Koshiba, 2019</i><br>(40)   | Non-RCT | Middle-age | Cycling                                      | Low-intensity  | 12      | 2 – 3 | 50      | Decrease of brachial-ankle PWV after exercise intervention ( $p < 0.001$ . $p < 0.01$ and $p < 0.05$ , respectively) in middle-aged females. No effect on CAVI.                    |
| <i>Novaković, 2019</i><br>(69) | RCT     | Older      | Walking + cycling                            | Low-intensity  | 12 – 18 | 3     | 60      | Exercise intervention increased FMD ( $p = 0.002$ ) and decreased PWV ( $p = 0.013$ ).                                                                                             |
| <i>Nualnim, 2012</i><br>(70)   | RCT     | Middle-age | Swimming                                     | Low-intensity  | 12      | 3 – 4 | 12 – 45 | Exercise intervention increased FMD ( $p < 0.05$ ). No effects were observed on femoral-ankle PWV and carotid ALX.                                                                 |
| <i>Nyberg, 2016</i><br>(29)    | Non-RCT | Middle-age | Cycling                                      | Low-intensity  | 12      | 3     | 60      | Exercise training improved Ach-induced vasodilation in postmenopausal women ( $p < 0.05$ ).                                                                                        |
| <i>Park SY, 2020</i><br>(72)   | RCT     | Middle-age | Aquatic gait                                 | Low-intensity  | 12      | 4     | 60      | Exercise intervention decreased leg and brachial-to-ankle arterial PWV in patients with peripheral artery disease ( $p < 0.5$ ). None effect on ABI.                               |
| <i>Park S-Y, 2019</i><br>(73)  | RCT     | Older      | Walking                                      | Low-intensity  | 12      | 4     | 60      | Exercise intervention decreased femoral-to-ankle PWV ( $p < 0.05$ ). No effects were observed on ABI.                                                                              |
| <i>Tanahashi, 2017</i><br>(32) | Non-RCT | Middle-age | Cycling or walking                           | Low-intensity  | 12      | 3     | 30      | Exercise intervention improves conduit artery decreasing baIMT ( $p < 0.05$ ). No effects were observed on NID (at rest and 10 min after GTN).                                     |

| Type of exercise: Resistance |         |                  |          |                          |        |       |         |                                                                                                                                  |
|------------------------------|---------|------------------|----------|--------------------------|--------|-------|---------|----------------------------------------------------------------------------------------------------------------------------------|
| <i>Vinet, 2018 (79)</i>      | RCT     | Middle-age/older | NR       | High-intensity           | 24     | NR    | NR      | Improvement of large vessels vascular function (FMD) after exercise intervention in metabolic syndrome patients ( $p < 0.001$ ). |
| <i>Williams, 2013 (80)</i>   | RCT     | Older            | Strength | High-intensity           | 16     | 2     | NR      | No effect on ALX.                                                                                                                |
| <i>Greenwood, 2015 (50)</i>  | RCT     | Middle-age       | Strength | Moderated-high-intensity | 12     | 3     | 47      | Resistance training improved PWV in kidney transplant recipients ( $p < 0.001$ ).                                                |
| <i>Hildreth, 2018 (55)</i>   | RCT     | Older            | Strength | Moderated-high-intensity | 48     | 2 – 3 | 20 – 35 | No effects of exercise training on carotid IMD and brachial artery FMD in older men.                                             |
| <i>Lekavich, 2021 (65)</i>   | RCT     | Middle-age       | Strength | Moderated-high-intensity | 32     | 3     | 60      | Resistance training increased FMD ( $p = 0.004$ ).                                                                               |
| <i>Grafe, 2018 (36)</i>      | Non-RCT | Older            | Strength | Moderated-intensity      | 12     | 2 – 3 | 20      | No effect on RH-induced FMD.                                                                                                     |
| <i>Green, 2014 (37)</i>      | Non-RCT | Middle-age       | Strength | Moderated-intensity      | 8 – 16 | 2     | NR      | Exercise intervention increased baFMD ( $p < 0.001$ ).                                                                           |
| <i>Kujawski, 2018 (62)</i>   | RCT     | Middle-age/older | Strength | Moderated-intensity      | 12     | 2     | 50      | No effects of resistance training in PWV.                                                                                        |
| <i>O'Brien, 2020 (71)</i>    | RCT     | Older            | Strength | Moderated-intensity      | 6      | 3     | 40      | No effect on baFMD, pop- FMD and L-FMC.                                                                                          |
| <i>Schmidt, 2014 (76)</i>    | RCT     | Older            | Strength | Moderated-intensity      | 48     | 2 – 3 | 60      | No effects of strength training on RHI and ALX.                                                                                  |
| <i>Eigendorf, 2019 (43)</i>  | RCT     | Middle-age       | Strength | Low-intensity            | 6      | 3     | 20      | Exercise intervention decreased PWV ( $p = 0.057$ ).                                                                             |
| <i>Jaime, 2019 (57)</i>      | RCT     | Middle-age       | Strength | Low-intensity            | 12     | 2 – 3 | 20 – 35 | Whole-body exercise intervention decreased ALX and ALX 75% (both $p < 0.05$ ). No effects were observed on PWV.                  |
| <i>Munch, 2018 (68)</i>      | RCT     | Middle-age/older | Strength | Low-intensity            | 6      | 3     | 25      | No alterations in vascular function (FMD and leg blood flow during active leg movement) after training.                          |
| Type of exercise: Combined   |         |                  |          |                          |        |       |         |                                                                                                                                  |

[illegible]

|                                |         |            |                           |                                              |         |   |    |                                                                                                                                            |
|--------------------------------|---------|------------|---------------------------|----------------------------------------------|---------|---|----|--------------------------------------------------------------------------------------------------------------------------------------------|
| <b>Boonpin, 2017</b><br>(53)   | RCT     | Middle-age | Active - static           | Minimal discomfort                           | 6       | 5 | 30 | Stretching training improved baPWV ( $P < 0.05$ ).                                                                                         |
| <b>Hotta, 2019</b><br>(56)     | RCT     | Older      | Passive (splint) - static | Minimal discomfort (any pain)                | 4       | 5 | 30 | Stretching training increase FMD ( $p = 0.005$ ). No effects were observed on NID (at rest and 10 min after NTG).                          |
| <b>Kato, 2017</b><br>(58)      | RCT     | Older      | Active - static           | Minimal discomfort (any pain)                | 4       | 3 | 20 | Stretching training increased RH-PAT index ( $p < .05$ )                                                                                   |
| <b>Kim, 2019</b><br>(39)       | Non-RCT | Older      | Active + passive - static | RPE $\leq 11$<br>"fairly light" (Borg scale) | 8       | 3 | 90 | No effects were observed on ABI and CAVI.                                                                                                  |
| <b>Nishiwaki, 2015</b><br>(28) | Non-RCT | Middle-age | Active - static           | Minimal discomfort (mild stretching)         | 4       | 5 | 30 | Stretching training induced a reduction in arterial stiffness: reducing baPWV ( $p < 0.05$ ) and CAVI ( $p < 0.05$ ).                      |
| <b>Shinno, 2017</b><br>(78)    | RCT     | Middle-age | Active - static           | "Somewhat heavy" to "Heavy" (RPE-Borg Scale) | 12 – 24 | 5 | 15 | Stretching training improved arterial stiffness increasing RH-PAT ( $p < 0.01$ ). Stretching training effects were reversed by detraining. |
| <b>Williams, 2013</b><br>(80)  | RCT     | Older      | Flexibility               | NR                                           | 16      | 2 | 45 | Flexibility training increased ALX ( $p < 0.05$ ).                                                                                         |
| <b>Wong, 2014</b><br>(81)      | RCT     | Middle-age | Active + passive - static | Maximal exertion (RPE>18)                    | 8       | 5 | 30 | Stretching training increased aortic ALX ( $p < 0.05$ ).                                                                                   |

Ankle brachial index (**ABI**); Acetylcholine (**ACh**); Augmentation index (**ALX**); Brachial-ankle PWV (**baPWV**); Cardio-ankle vascular index (**CAVI**); Flow-mediated dilatation (**FMD**); Glyceryl trinitrate-response (**GTN**); High intensity training (**HIT**); High intensity interval training (**HIIT**); Intima-media thickness (**IMT**); Low flow-mediated constriction (**L-FMC**); Leg vascular conductance (**LVC**); Nitroglycerin-induced dilation (**NID**); Not reported (**NR**); Nitroglycerin (**NTG**); Pulse wave velocity (**PWV**); Randomized controlled trial (**RCT**); Reactive hyperemia (**RH**); Reactive hyperemia peripheral arterial tonometry index (**RH-PAT**); Rating of Perceived Exertion (**RPE**); Sodium nitroprusside (**SNP**).
